# Supplementary material
Source: Springer Nature journal article supplement (https://www.springermedizin.de/resource/supplementary/12913_2007_706_MOESM1_ESM.pdf/9535358)
Supplement: MOESM1 [file 9535358]

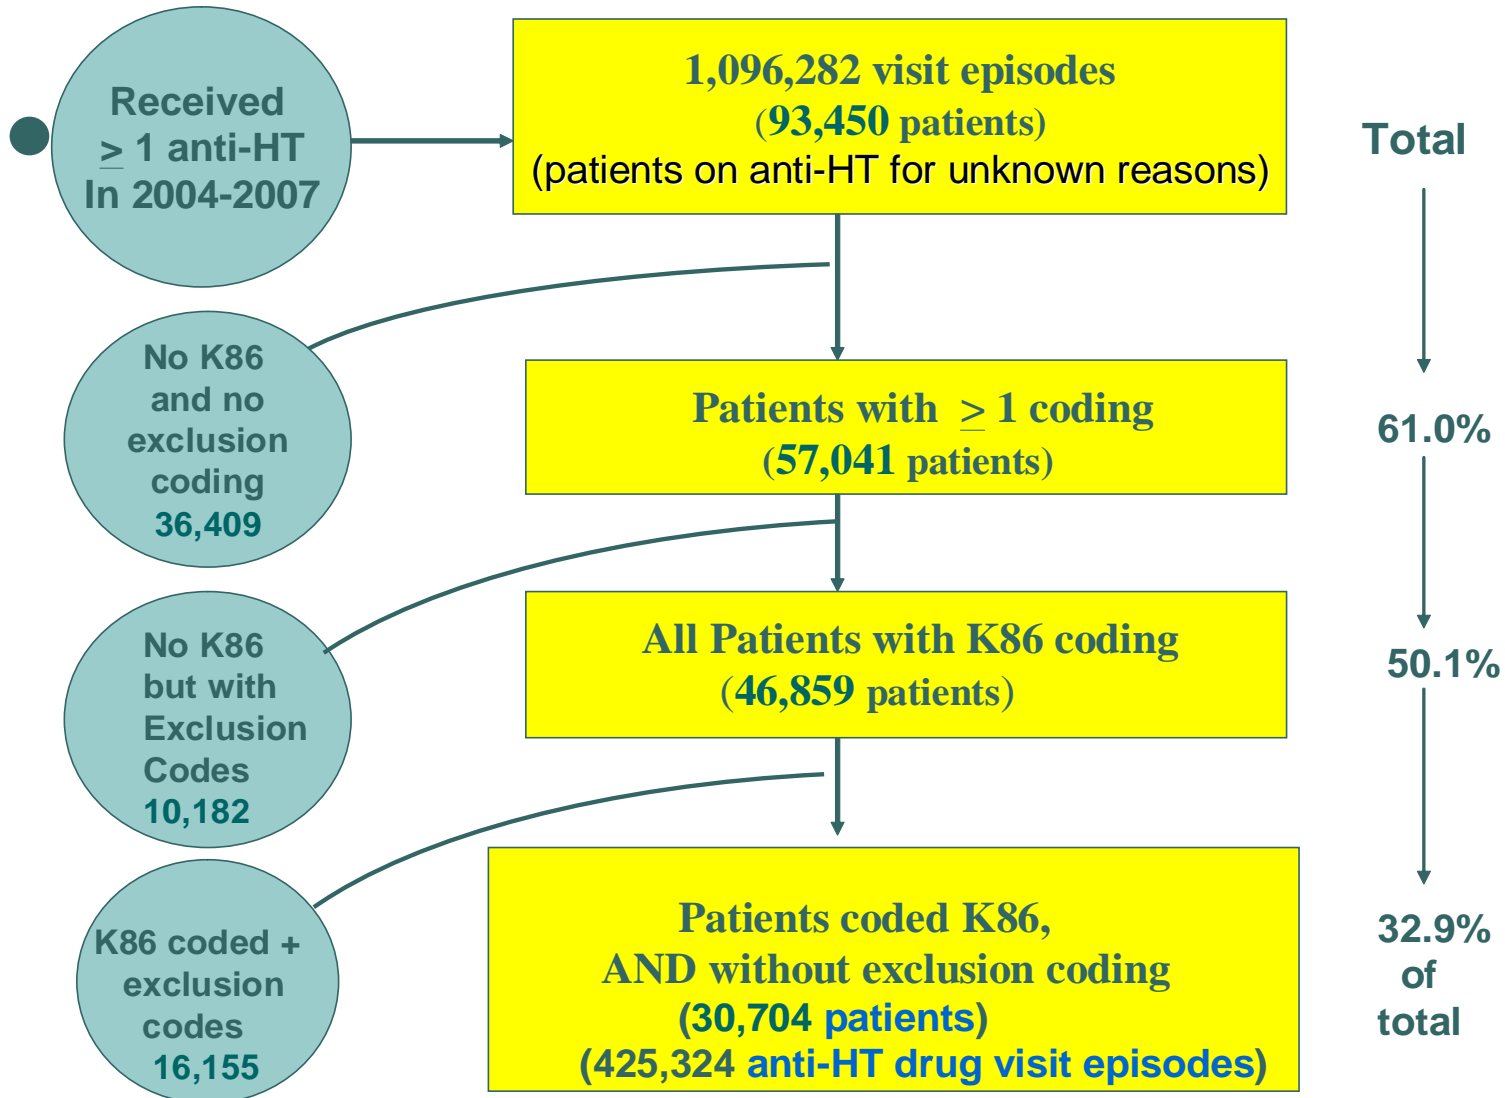

Received  $\geq 1$  anti-HT In 2004-2007

1,096,282 visit episodes  
(93,450 patients)  
(patients on anti-HT for unknown reasons)

Total

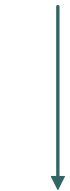

61.0%

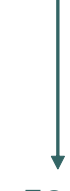

50.1%

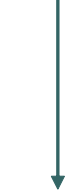

32.9%  
of  
total

No K86 and no exclusion coding  
36,409

Patients with  $\geq 1$  coding  
(57,041 patients)

No K86 but with Exclusion Codes  
10,182

All Patients with K86 coding  
(46,859 patients)

K86 coded + exclusion codes  
16,155

Patients coded K86,  
AND without exclusion coding  
(30,704 patients)  
(425,324 anti-HT drug visit episodes)
